# Supplementary material
Source: MDPI journal article supplement (https://www.mdpi.com/2071-1050/9/11/2118)
Supplement: s1 [file s1]

## Supplementary Materials:

### How do terrestrial determinants impact the response of water quality to climate drivers? – An elasticity perspective on water-land-climate nexus

By Afed U. Khan, Jiping Jiang\*, Ashish Sharma, Peng Wang, and Jehanzeb Khan

Email: jiangjp@sustc.edu.cn

|                                                                                                                                 |     |
|---------------------------------------------------------------------------------------------------------------------------------|-----|
| Table S1. Summary of rivers and monitoring stations investigated in this study.....                                             | (1) |
| Table S2. Summary of water quality parameters evaluated in the study. ....                                                      | (1) |
| Figure S1. Percent anthropogenic biomes and surficial geology at sub watersheds scale for each monitoring station.....          | (2) |
| Figure S2. Best fitted time series trend models for water quality parameters at Yukon, Mekong and Murray monitoring sites. .... | (3) |
| Figure S3. Spatial trend patterns at Murray monitoring sites. ....                                                              | (4) |
| Figure S4. Spatial trend patterns at Yukon monitoring sites. . ....                                                             | (5) |
| Figure S5. Significant time series trend patterns at Murray monitoring sites. ....                                              | (6) |
| Figure S6. Significant time series trend patterns of nitrogen and phosphorous parameters at Yukon monitoring sites.....         | (7) |
| Figure S7. Significant time series trend patterns of turbidity, water temperature, DOC and DO at Murray monitoring sites.....   | (8) |

**Table S1.** Summary of rivers and monitoring stations investigated in this study.

| River  | Monitoring sites code | Record length | Time Series | Country/ies station located | Climate type <sup>a</sup> |
|--------|-----------------------|---------------|-------------|-----------------------------|---------------------------|
| Mekong | Mek-070002            |               | 1985-2008   | Cambodia,                   | Aw                        |
|        | Mek-064002            | 9-24          | 2000-2008   | Laos,                       |                           |
|        | Mek-054010            | yrs           | 1985-2008   | Thailand,                   |                           |
|        | Mek-054009            |               | 1985-2008   | Vietnam                     |                           |
| Yukon  | Yuk-028003            |               | 1979-2005   | US                          | Dfc, Dsc                  |
|        | Yuk-028540            | 6, 21, 27     | 1985-2005   |                             |                           |
|        | Yuk-028546            | yrs           | 2000-2005   |                             |                           |
|        | Mur-119               |               | 1970-2008   |                             |                           |
| Murray | Mur-118               |               | 1970-2008   | Australia                   | Aw                        |
|        | Mur-117               | 36-39         | 1973-2008   |                             |                           |
|        | Mur-116               | yrs           | 1970-2007   |                             |                           |
|        | Mur-102 <sup>b</sup>  |               | 1972-2007   |                             |                           |

<sup>a</sup> Köppen–Geiger climate classification 1976–2000 for stations in the given rivers (Rubel and Kottek, 2010).

<sup>b</sup> Cooper river

**Table S2.** Summary of water quality parameters evaluated in the study.

| Class | Abb. <sup>a</sup>                 | Name                          | Unit                 |
|-------|-----------------------------------|-------------------------------|----------------------|
| Phys. | Turb                              | Turbidity                     | NTU                  |
|       | Temp                              | Water temperature             | °C                   |
| O     | DO                                | Dissolved oxygen              | mg O <sub>2</sub> /L |
| C     | DOC                               | Dissolved organic carbon      | mg C/L               |
| N     | TN-UF                             | Total nitrogen i.e. TN        | mg N/L               |
|       | NH <sub>4</sub> <sup>+</sup> -F   | Ammonia as N                  | mg N/L               |
|       | NO <sub>2</sub> <sup>-</sup> -F   | Nitrite as N                  | mg N/L               |
|       | NO <sub>x</sub> <sup>-</sup> -F   | Nitrate + Nitrite as N        | mg N/L               |
| P     | P-F                               | Dissolved phosphorus          | mg P/L               |
|       | P-UF                              | Total phosphorus i.e. TP      | mg P/L               |
|       | PO <sub>4</sub> <sup>3-</sup> -F  | Dissolved orthophosphate as P | mg P/L               |
|       | PO <sub>4</sub> <sup>3-</sup> -UF | Total orthophosphate as P     | mg P/L               |

a. Abbreviation. F: filtered(dissolved), UF: unfiltered(total).

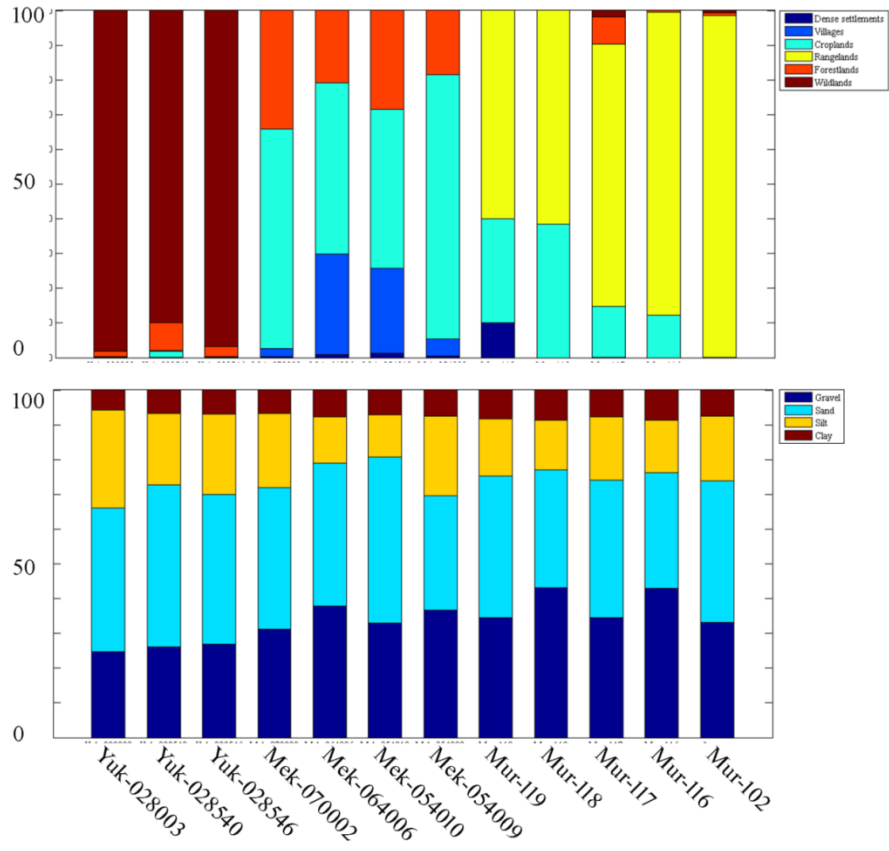

**Figure S1.** Percent anthropogenic biomes and surficial geology at sub watersheds scale for each monitoring station.

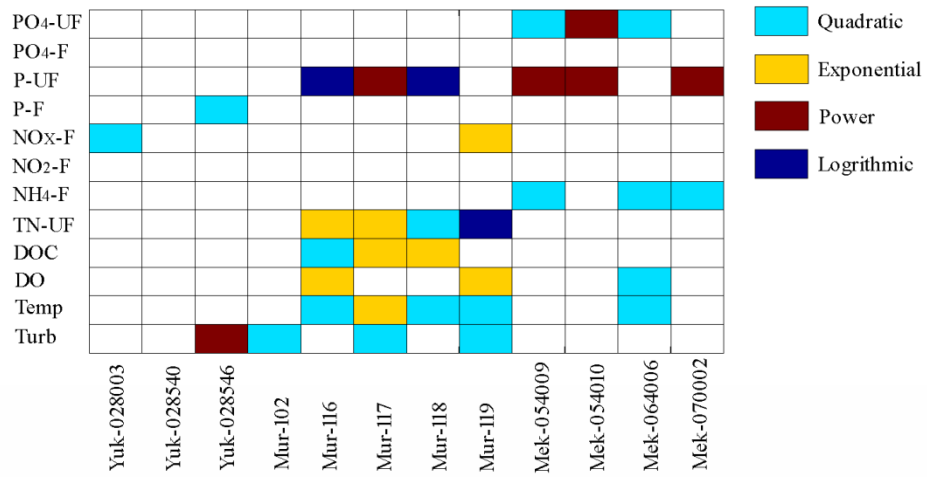

**Figure S2.** Best fitted time series trend models for water quality parameters at Yukon, Mekong and Murray monitoring sites.



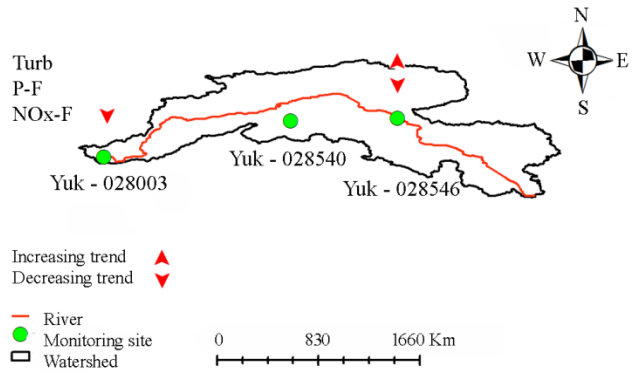

**Figure S4.** Spatial trend patterns at Yukon monitoring sites.

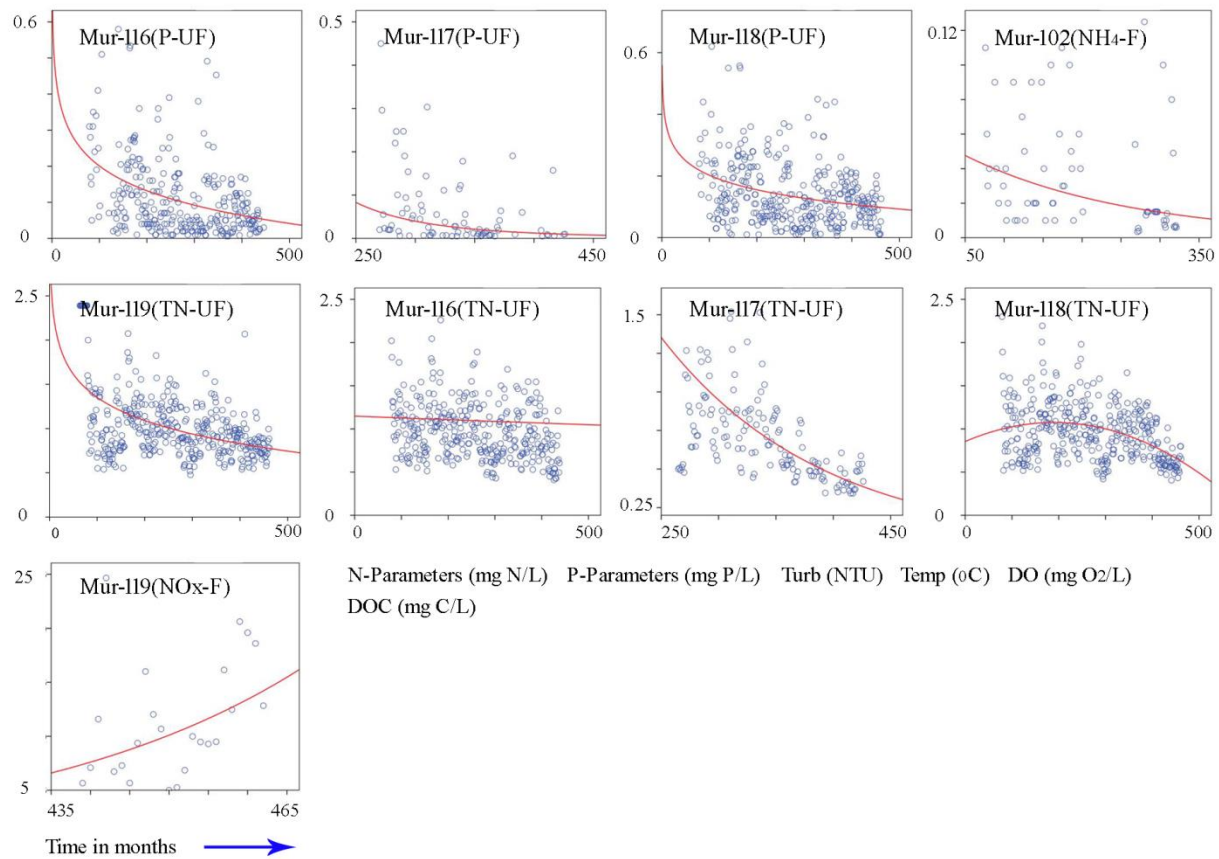

**Figure S5.** Significant time series trend patterns of nitrogen and phosphorous parameters at Murray monitoring sites.

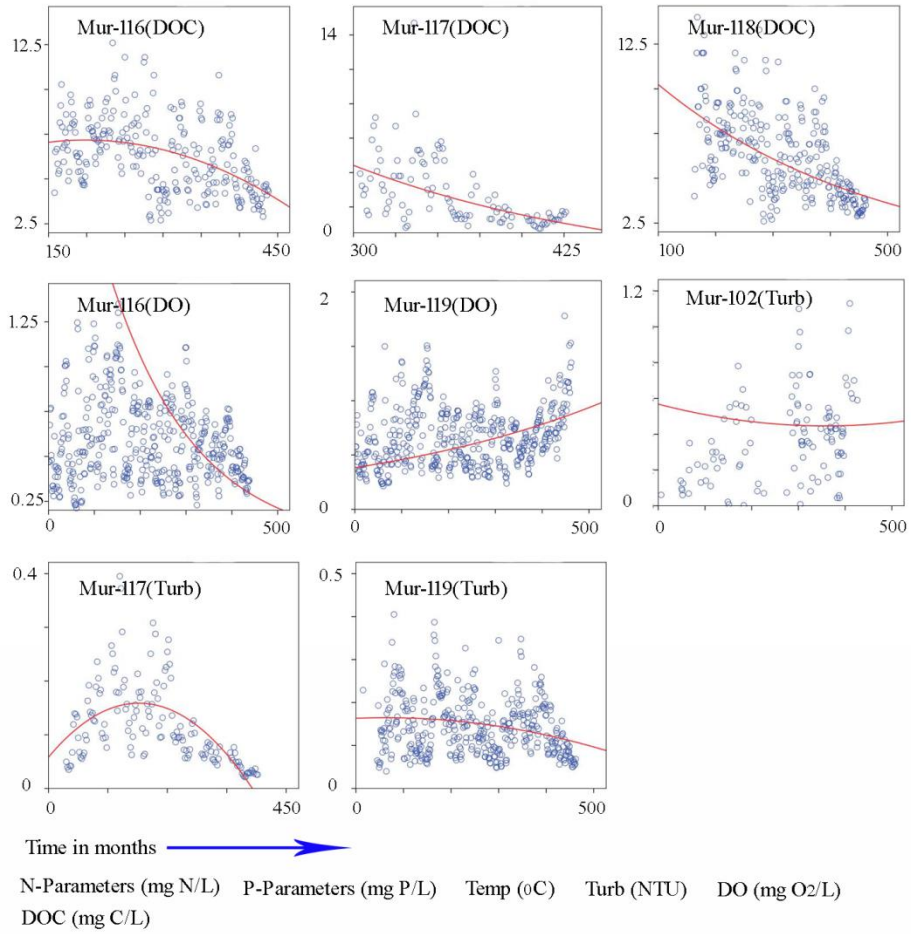

**Figure S6.** Significant time series trend patterns of turbidity, water temperature, DOC and DO at Murray monitoring sites.



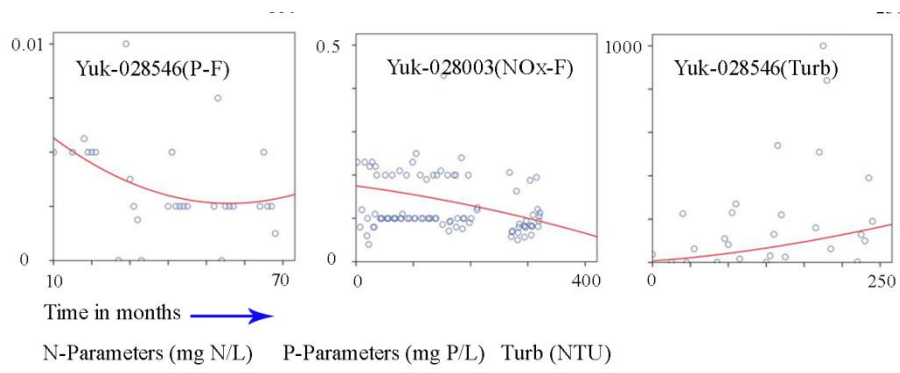

**Figure S7.** Significant time series trend patterns at Yukon monitoring sites.
